# Supplementary material for: Enhanced long-term nitrogen removal by organotrophic anammox bacteria under different C/N ratio constraints: quantitative molecular mechanism and microbial community dynamics
Source: Royal Society of Chemistry journal article supplement (doi:10.1039/c6ra04114k), 2016-01-01
Supplement: c6ra04114k1.pdf [file c6ra04114k1.pdf]

## Supplementary data

### **Enhanced long-term nitrogen removal by organotrophic anammox bacteria under different C/N ratio constrains: quantitative molecular mechanism and microbial community dynamics**

Duntao Shu<sup>a, b ‡</sup>, Yanling He<sup>c\*</sup>, Hong Yue<sup>d ‡</sup>, Junling Gao<sup>e</sup>, Qingyi Wang<sup>e</sup>, Shucheng Yang<sup>f</sup>

<sup>a</sup> State Key Laboratory of Crop Stress Biology in Arid Areas, College of Life Sciences, Northwest A&F University, Yangling, Shaanxi 712100, China

<sup>b</sup> Center for Mitochondrial Biology and Medicine, The Key Laboratory of Biomedical Information Engineering of the Ministry of Education, School of Life Science and Technology, Xi'an Jiaotong University, Shaanxi 710049, China

<sup>c</sup> School of Human Settlements & Civil Engineering, Xi'an Jiaotong University, Shaanxi 710049, China

<sup>d</sup> State Key Laboratory of Crop Stress Biology in Arid Areas, College of Agronomy and Yangling Branch of China Wheat Improvement Center, Northwest A&F University, Yangling, Shaanxi 712100, China

<sup>e</sup> School of Chemical Engineering & Technology, Xi'an Jiaotong University, Shaanxi 710049, China

<sup>f</sup> School of Energy and Power Engineering, Xi'an Jiaotong University, Shaanxi 710049, China

---

\* Corresponding author. Email: heyl@mail.xjtu.edu.cn; Tel/Fax: 0086 029 83395128.

‡ These authors contributed equally to this work.

## **Contents**

### **1. Tables**

**Table S1** Primers used for qPCR thermal programs in this study.

**Table S2** Raw and effective reads, plus numbers of OTUs, Good's coverage, Shannon, Chao1, ACE, and Simpson of five phases.

### **2. Figures**

**Figure S1** Rarefaction curves base on MiSeq sequencing of bacterial communities in different phases. The OTUs were defined by 3% distances.

**Figure S2** Beta diversity for five samples. (a) 3-D PCoA analysis; (b) 2-D PCoA analysis.

**Figure S3** Distributions of bacteria in five phases at different taxonomy level. (a) At class level; (b) at order level; (c) at family level; (d) at genus level. Taxa represented occurred at  $> 0.5\%$  frequency in at least one sample. Others refer to the taxa with their maximum abundance  $< 0.5\%$  in any sample.

### **4. References**

**Table S1** Primers used for qPCR and thermal programs in this study.

| Target prokaryote                       | Target gene | Sequence (5'-3') of primer pairs                                  | Annealing (°C) | Thermal program                                                                        | Reference    |
|-----------------------------------------|-------------|-------------------------------------------------------------------|----------------|----------------------------------------------------------------------------------------|--------------|
| Total bacteria                          | 16S rRNA    | 341F: CCTACGGGAGGCAGCAG<br>518R: ATTACCGGGCTGCTGG                 | 60             | 5 min at 95°C, 40 cycles of 30 s at 95°C, 30 s at 60°C, and 40 s at 72°C               | <sup>1</sup> |
| Anammox Bacteria                        | 16S rRNA    | Amx809f: GCCGTAAACGATGGGCACT<br>Amx1066r: AACGTCTCACGACACGAGCTG   | 60             | 10min at 95°C, followed by 35 cycles of 60 s at 95°C, 60 s at 60°C, and 45 s at 72°C   | <sup>2</sup> |
| AOA                                     | <i>amoA</i> | amoAF: STAATGGTCTGGCTTAGACG<br>amoAR: GCGGCCATCCATCTGTATGT        | 53             | 3 min at 94°C, followed by 40 cycles of 30 s at 94°C, 1 min at 53°C, and 1 min at 72°C | <sup>3</sup> |
| AOB                                     | <i>amoA</i> | amoAF: GGGGTTTCTACTGGTGGT<br>amoAR: CCCCTCKGSAAAGCCTTCTTC         | 55             | 3 min at 94°C, followed by 40 cycles of 30 s at 94°C, 30 s at 55°C, and 45 s at 72°C   | <sup>4</sup> |
| Denitrifying bacteria                   | <i>nosZ</i> | nosZ1F: WCSYTGTTTCMTCGACAGCCAG<br>nosZ1R: ATGTCGATCARCTGVKCRTTYTC | 63             | 5 min at 95°C, followed by 35 cycles of 60 s at 95°C, 60 s at 63°C, and 45 s at 72°C   | <sup>5</sup> |
| Denitrifying bacteria                   | <i>nirS</i> | nirSnF: TACCACCCCGAGCCGCGCGT<br>nirSnr: GCCGCCGTCRTGVAGGAA        | 63             | 5 min at 95°C, followed by 35 cycles of 60 s at 95°C, 60 s at 63°C, and 45 s at 72°C   | <sup>6</sup> |
| Denitrifying bacteria                   | <i>nirK</i> | nirKF: ATYGGCGGVAYGGCGA<br>nirKR: GCCTCGATCAGRTRTRTGG             | 57             | 5 min at 95°C, followed by 35 cycles of 60 s at 95°C, 60 s at 57°C, and 45 s at 72°C   | <sup>6</sup> |
| Dissimilarity nitrite reducing bacteria | <i>narG</i> | narG2F: CTCGAYCTGGTGGTYGA<br>narG2R: TTYTCGTACCAGGTS GC           | 55             | 5 min at 95°C, followed by 35 cycles of 60 s at 95°C, 60 s at 55°C, and 45 s at 72°C   | <sup>7</sup> |
| Dissimilarity nitrite reducing bacteria | <i>napA</i> | napA3F: CCCAATGCTCGCCACTG<br>napA3R: CATGTTKGAGCCCCACAG           | 60             | 5 min at 95°C, followed by 35 cycles of 60 s at 95°C, 60 s at 60°C, and 45 s at 72°C   | <sup>7</sup> |
| Dissimilarity nitrate reducing bacteria | <i>nrfA</i> | nrfA2F: CACGACAGCAAGACTGCCG<br>nrfA2R: CCGGCACTTTCGAGCCC          | 60             | 5 min at 95°C, followed by 35 cycles of 60 s at 95°C, 60 s at 60°C, and 45 s at 72°C   | <sup>8</sup> |
| Nitrite oxidizing                       | <i>nxrA</i> | F1norA: CAGACCGACGTGTGCGAAAG                                      | 57             | Pre-heating at 50 °C for 2 min, pre-denaturation at 95 °C                              | <sup>9</sup> |

|                           |      |                                                                  |    |                                                                                                          |    |
|---------------------------|------|------------------------------------------------------------------|----|----------------------------------------------------------------------------------------------------------|----|
| bacteria                  |      | R1norA: TCYACAAGGAACGGAAGGTC                                     |    | for 10 min, denaturation at 95 °C for 15 s, annealing at 57 °C for 30 s, and extension at 72 °C for 30 s |    |
| Methanogen bacteria       | mcrA | mcrAme1f: GCMATGCARATHGGWATGTC<br>mcrAme3r: TGTGTGAASCCKACDCCACC | 54 | 10 min at 95°C, followed by 35 cycles of 60 s at 95°C, 60 s at 60°C, and 45 s at 72°C                    | 10 |
| Sulfate reducing bacteria | dsrA | dsr1F: ACSCACTGGAAGCACGGCGG<br>dsrR: GTGGMRCCTGCAKRTTGG          | 63 | 10 min at 95°C, followed by 35 cycles of 60 s at 95°C, 60 s at 63°C, and 45 s at 72°C                    | 11 |

**Table S2** Raw and effective reads, plus numbers of OTUs, Good's coverage, Shannon, Chao1, ACE, and Simpson of five phases.

| Sample ID | Raw reads | Effective reads | OTUs | Good's coverage | Shannon | Chao 1  | ACE     | Simpson |
|-----------|-----------|-----------------|------|-----------------|---------|---------|---------|---------|
| phase I   | 24,789    | 17,454          | 1412 | 0.99            | 5.68    | 5273.04 | 5623.46 | 0.93    |
| phase II  | 25,514    | 17,724          | 1750 | 0.99            | 6.05    | 6630.98 | 7130.23 | 0.95    |
| phase III | 29,110    | 21,586          | 1112 | 0.99            | 5.05    | 3504.92 | 3842.40 | 0.88    |
| phase IV  | 21,284    | 15,453          | 1131 | 0.99            | 4.70    | 3456.78 | 3789.32 | 0.86    |
| phase V   | 21,172    | 14,505          | 1181 | 0.99            | 5.35    | 3774.60 | 4294.51 | 0.91    |

**Figure S1**

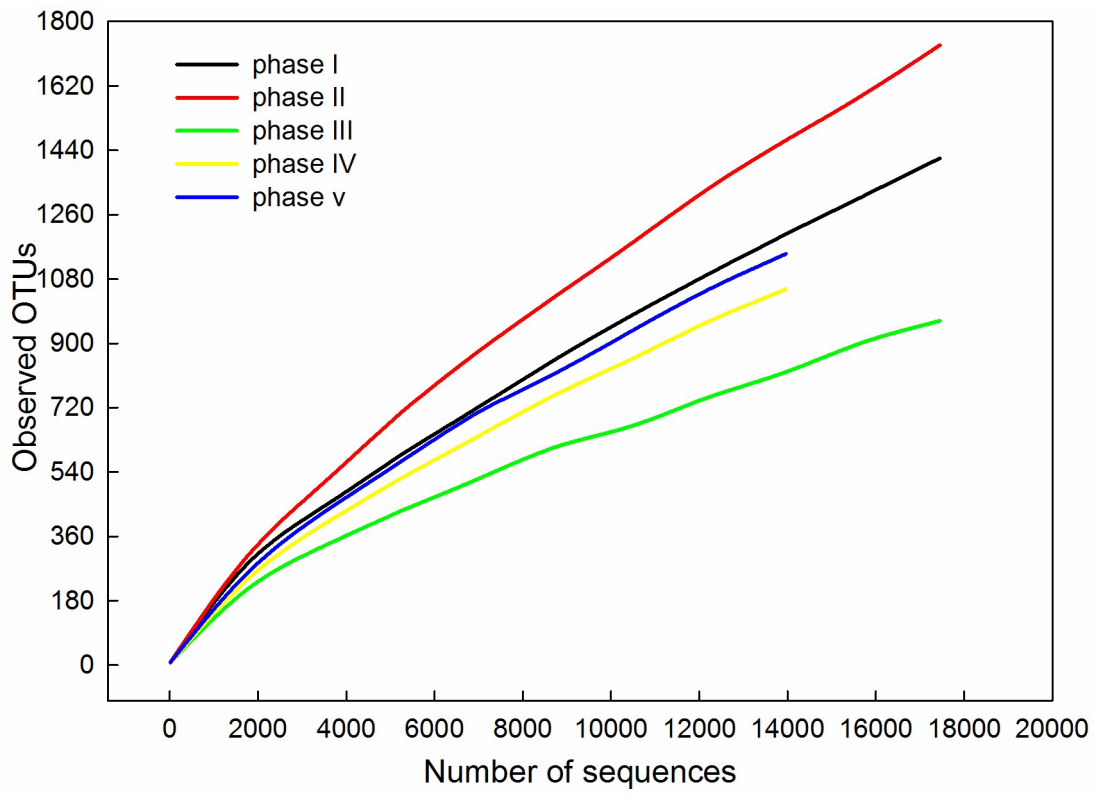

**Figure S1** Rarefaction curves base on MiSeq sequencing of bacterial communities in different phases. The OTUs were defined by 3% distances.

**Figure S2**

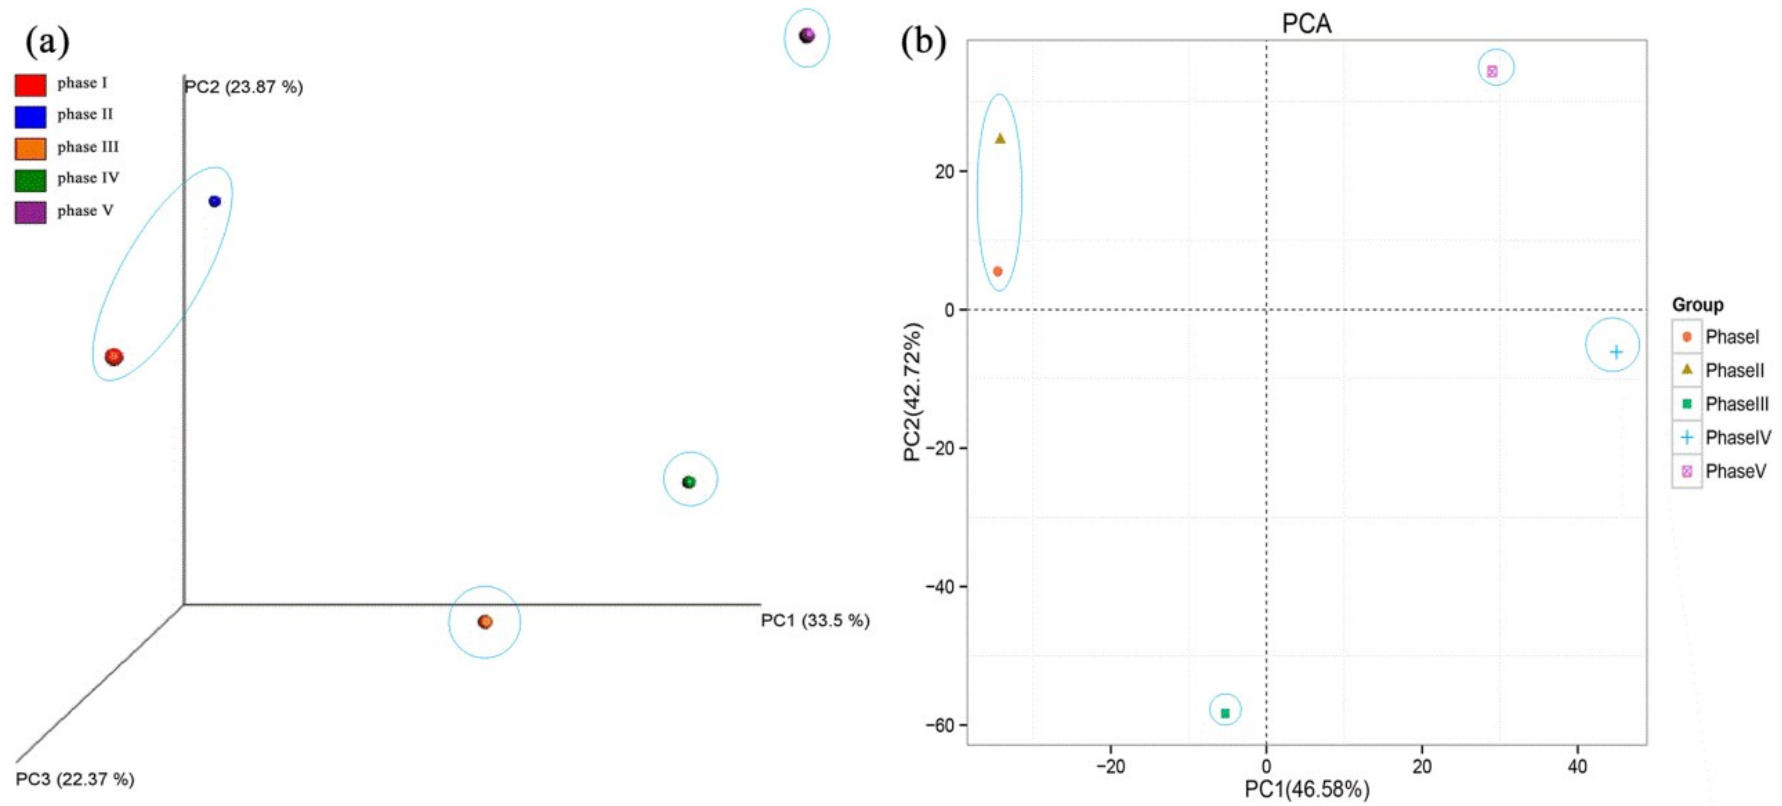

**Figure S2** Beta diversity for five samples. (a) 3-D PCoA analysis; (b) 2-D PCoA analysis.

**Figure S3a**

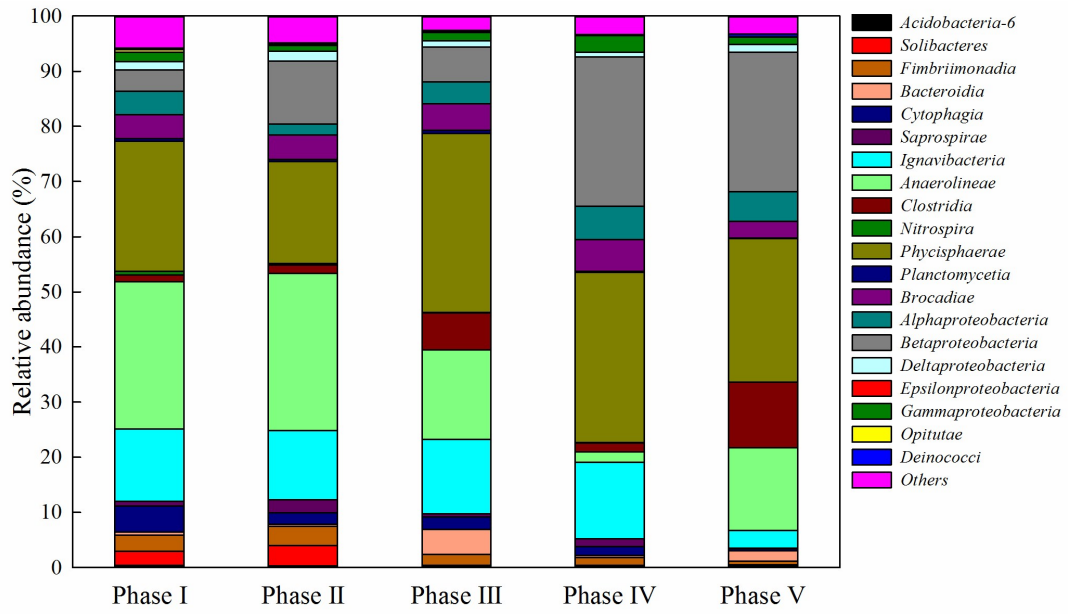



**Figure S3b**

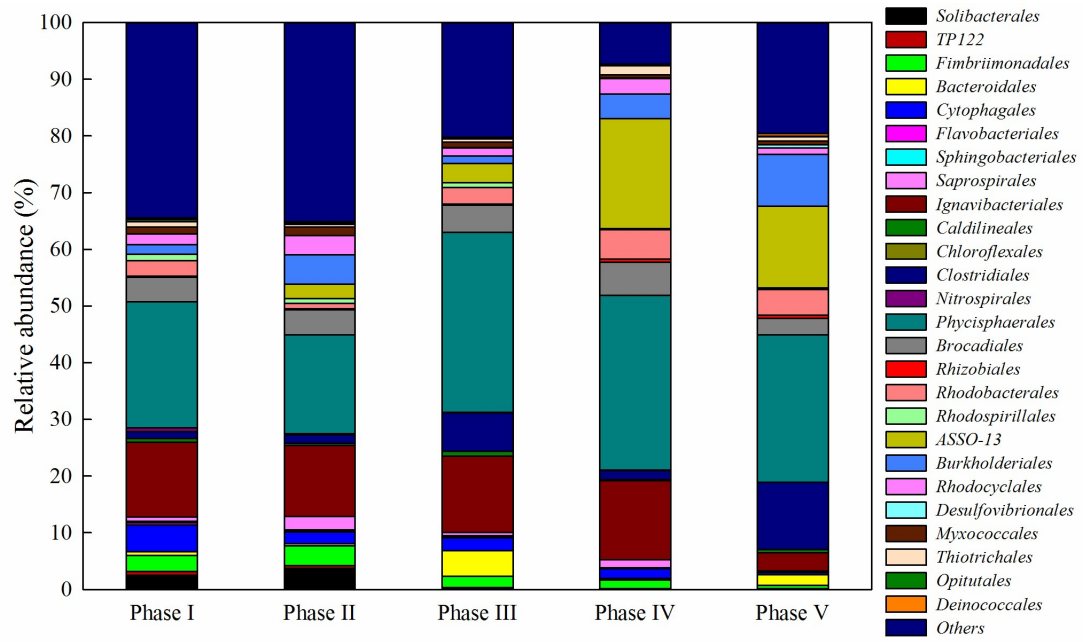

**Figure S3c**

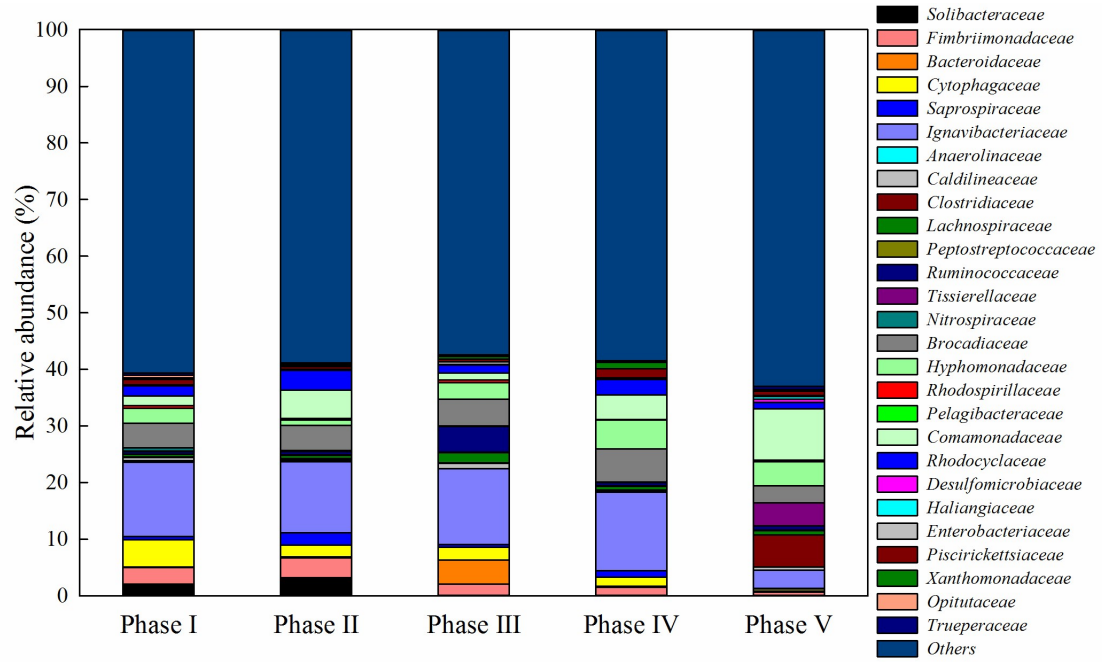

**Figure S3d**

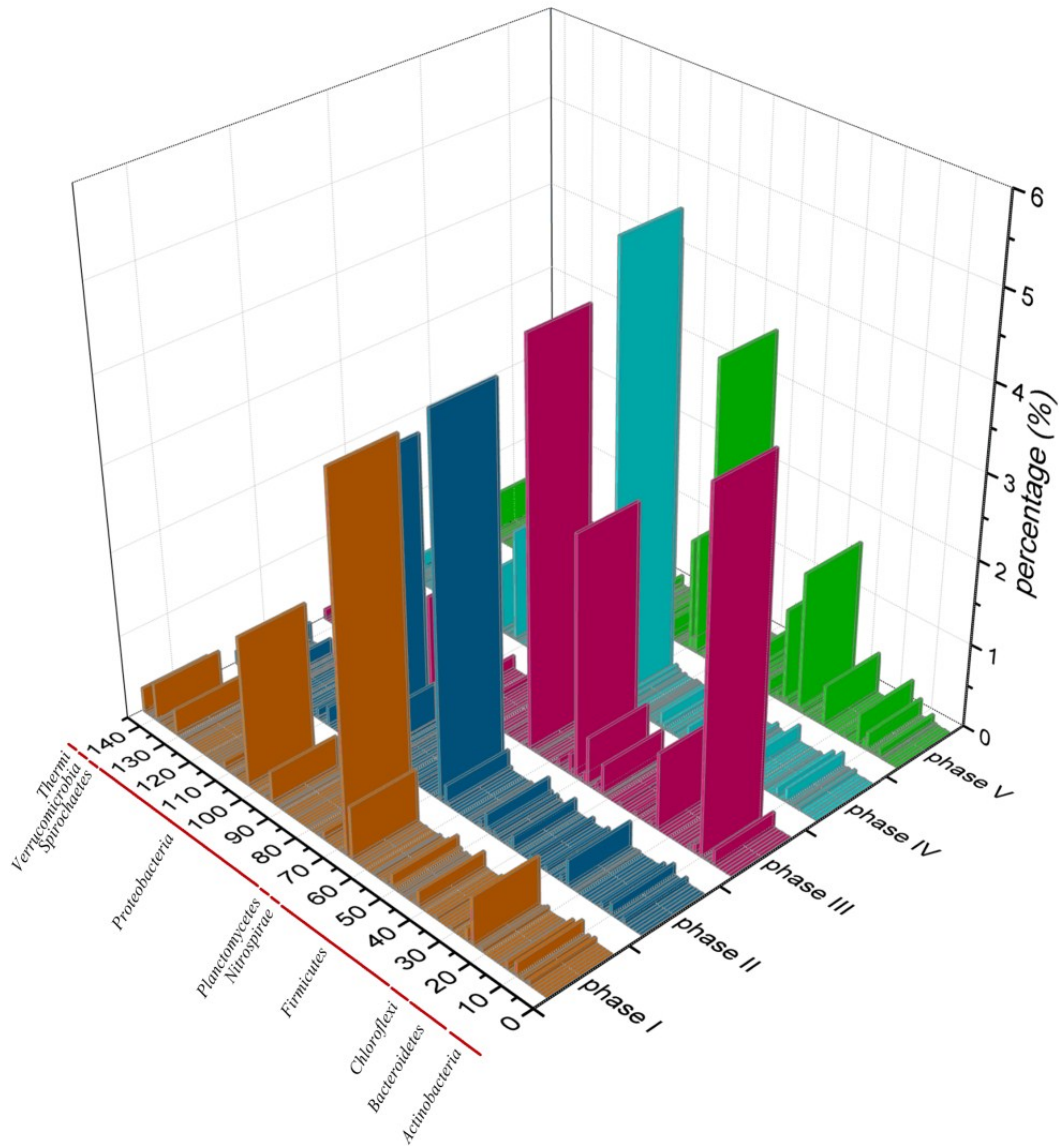

**Figure S3** Distributions of bacteria in five phases at different taxonomy level. (a) At class level; (b) at order level; (c) at family level; (d) at genus level. Taxa represented occurred at  $> 0.5\%$  frequency in at least one sample. Others refer to the taxa with their maximum abundance  $< 0.5\%$  in any sample.

## References

1. Y. Bai, Q. Sun, D. Wen and X. Tang, *FEMS microbiology ecology*, 2012, **8**, 323-330.
2. I. Tsushima, Y. Ogasawara, T. Kindaichi, H. Satoh and S. Okabe, *Water research*, 2007, **41**, 1623-1634.
3. C. A. Francis, K. J. Roberts, J. M. Beman, A. E. Santoro and B. B. Oakley, *Proceedings of the National Academy of Sciences of the United States of America*, 2005, **102**, 14683-14688.
4. J.-H. Rotthauwe, K.-P. Witzel and W. Liesack, *Applied and environmental microbiology*, 1997, **63**, 4704-4712.
5. S. Henry, D. Bru, B. Stres, S. Hallet and L. Philippot, *Applied and Environmental Microbiology*, 2006, **72**, 5181-5189.
6. E. Kandeler, K. Deiglmayr, D. Tscherko, D. Bru and L. Philippot, *Applied and Environmental Microbiology*, 2006, **72**, 5957-5962.
7. C. J. Smith, D. B. Nedwell, L. F. Dong and A. M. Osborn, *Applied and environmental microbiology*, 2007, **73**, 3612-3622.
8. P. Lam, G. Lavik, M. M. Jensen, J. van de Vossenberg, M. Schmid, D. Woebken, D. Gutiérrez, R. Amann, M. S. Jetten and M. M. Kuypers, *Proceedings of the National Academy of Sciences*, 2009, **106**, 4752-4757.
9. G. Ji, C. He and Y. Tan, *Ecological Engineering*, 2013, **55**, 35-42.
10. L. M. Steinberg and J. M. Regan, *Applied and environmental microbiology*, 2009, **75**, 4435-4442.

11. K. Biswas, M. Taylor and S. Turner, *Applied microbiology and biotechnology*, 2014, **98**, 7211-7222.
